# Supplementary material for: High-Efficiency Lentiviral Transduction of Human CD34+ Cells in High-Density Culture with Poloxamer and Prostaglandin E2
Source: PubMed Central journal article supplement — Mol Ther Methods Clin Dev. 2019 Jan 25;13:187–96. doi: 10.1016/j.omtm.2019.01.005 (PMC6370599; doi:10.1016/j.omtm.2019.01.005), 2019-01-25

**OMTM, Volume 13**

**Supplemental Information**

**High-Efficiency Lentiviral Transduction  
of Human CD34<sup>+</sup> Cells in High-Density Culture  
with Poloxamer and Prostaglandin E2**

**Naoya Uchida, Tina Nassehi, Claire M. Drysdale, Jackson Gamer, Morgan Yapundich, Selami Demirci, Juan J. Haro-Mora, Alexis Leonard, Matthew M. Hsieh, and John F. Tisdale**

## Supplementary figures

**Supplementary figure 1. Similar low-density lipoprotein receptor (LDL-R) expression was detected in high-density CD34<sup>+</sup> cells.** We evaluated LDL-R expression by flow cytometry at

various cell densities of human CD34<sup>+</sup> cells after 1-day culture. Values: mean  $\pm$  standard error.

All experiments were performed in triplicate.

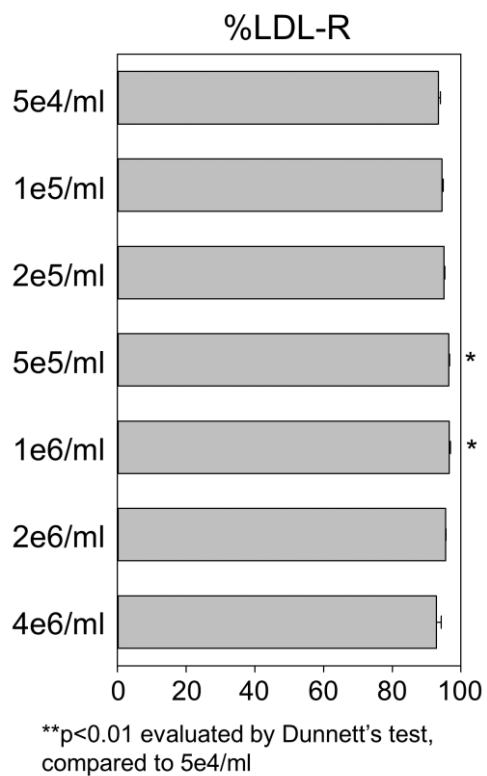

**Supplementary figure 2. Addition of poloxamer to a K562 erythroleukemia cell line results**

**in more efficient transduction with a lentiviral vector.** (a) We transduced K562 cells (1e5/ml)

with a GFP-expressing lentiviral vector at MOI 0.5 supplemented with various single reagents

(potential adjuvants), including polybrene (8µg/ml), protamine (8µg/ml), P188 (10, 100, and

1000µg/ml), P338 (10, 100, and 1000µg/ml), and P407 (10, 100, and 1000µg/ml) for 1

day. %GFP (day 3 after transduction), GFP intensity (day 3), and cell counts (day 4) were

evaluated 3-4 days after transduction. Values: mean ± standard error. All experiments were

performed in triplicate.

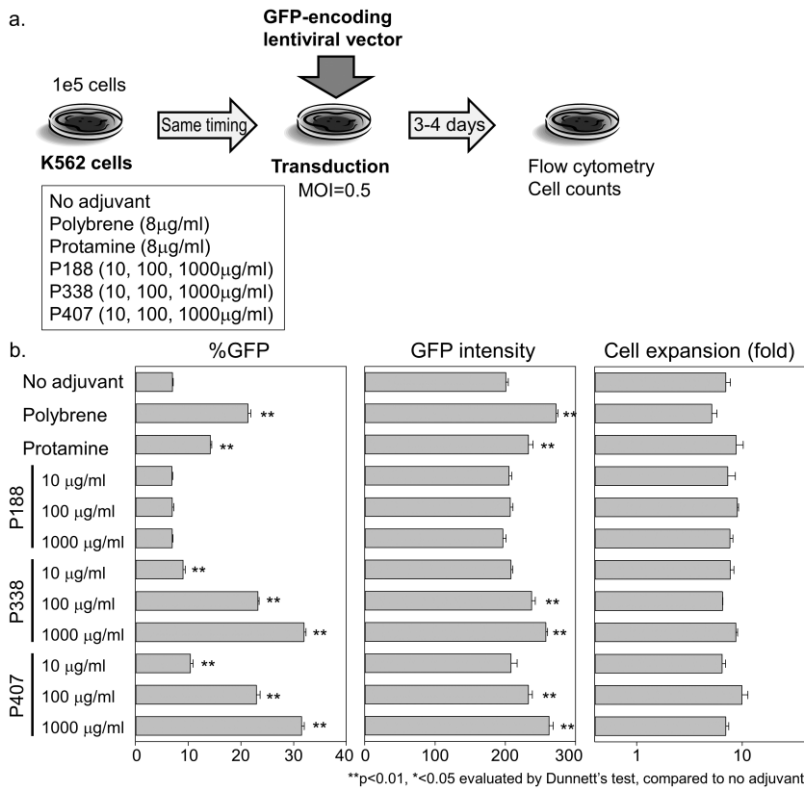

**Supplementary figure 3. Addition of poloxamer to high-density CD34<sup>+</sup> cell culture results in more efficient transduction with a lentiviral vector.** (a) After 1-day pre-stimulation, we transduced high-density CD34<sup>+</sup> cells (4e6/ml) at MOI 50 supplemented with various single reagents, using the same conditions described in Figures 3a and b. CD34 expression (%CD34) was evaluated 4 days after transduction. (b) After 1-day pre-stimulation, high-density CD34<sup>+</sup> cells (4e6/ml) were transduced with a GFP-expressing lentiviral vector at MOI 50 supplemented with P338 (100, 200, 500, and 1000 $\mu$ g/ml) or P407 (100, 200, 500, and 1000 $\mu$ g/ml) for 1 day. %GFP, GFP intensity, and cell counts were evaluated 4 days after transduction, and VCNs were evaluated 7 days after transduction. Values: mean  $\pm$  standard error. All experiments were performed in triplicate.

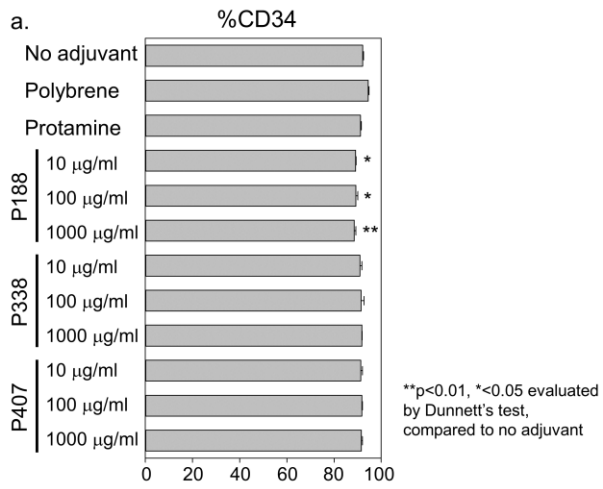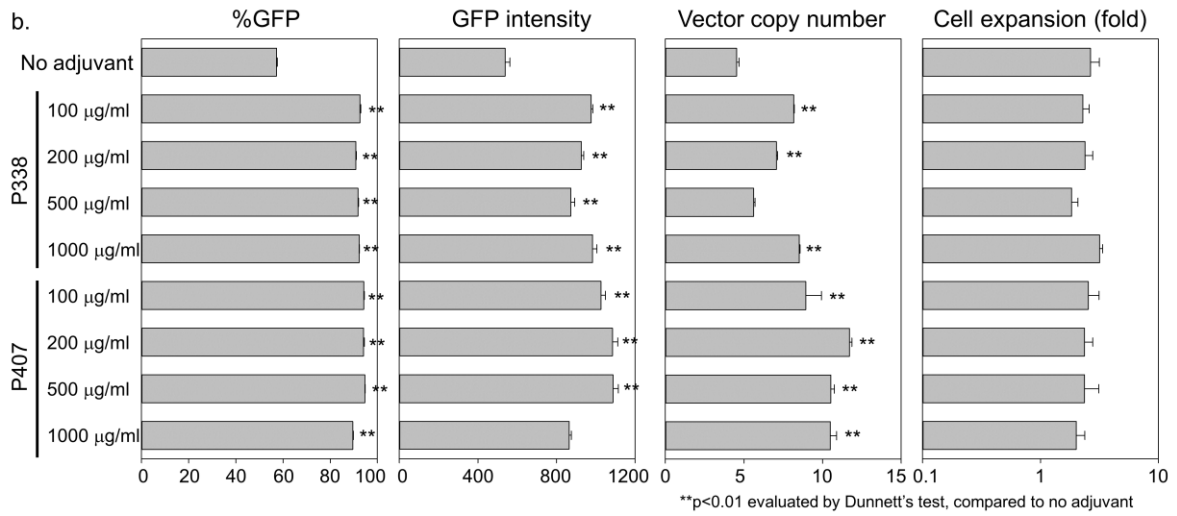

**Supplementary figure 4. More efficient lentiviral transduction in CFUs results from high-density CD34<sup>+</sup> cell culture with P407 and PGE2 supplementation.** After 1-day pre-stimulation, we transduced high-density CD34<sup>+</sup> cells with a GFP-expressing lentiviral vector at MOI 50 with P407 (100μg/ml), PGE2 (100μM), and a combination of P407 and PGE2. One day later, transduced cells were cultured in semi-solid media for 9 days, and CFUs and GFP positivity were evaluated by UV microscopy. Values: mean ± standard error. All experiments were performed in triplicate.

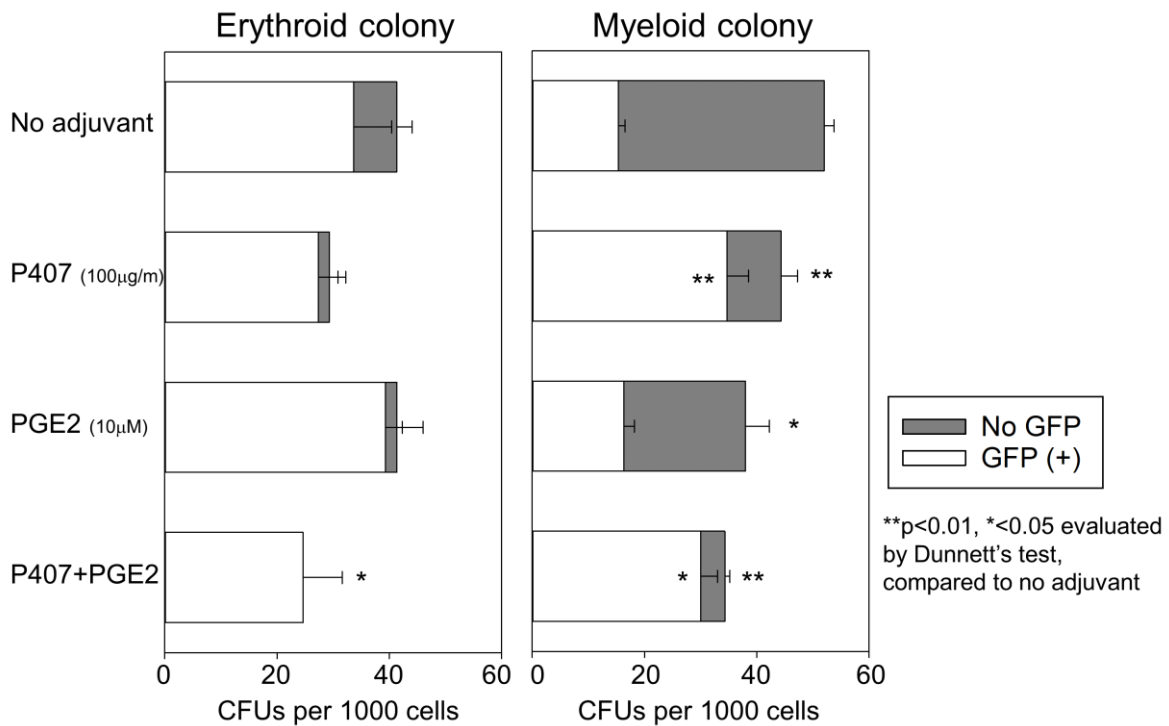

**Supplementary figure 5. High-density culture with P407 and PGE2 improves lentiviral**

**transduction in human CD34<sup>+</sup> cells.** (a) After 1-day pre-stimulation, human CD34<sup>+</sup> cells were transduced with a GFP-expressing lentiviral vector at MOI 50 in our standard cell density culture (1e5/ml) without adjuvant, as well as high-density culture (4e6/ml) with P407 (100μg/ml) and/or PGE2 (100μM). All %GFP, GFP intensity, VCNs, and cell counts were evaluated at the same time point (6 days after transduction). Values: mean ± standard error. All experiments were performed in triplicate.

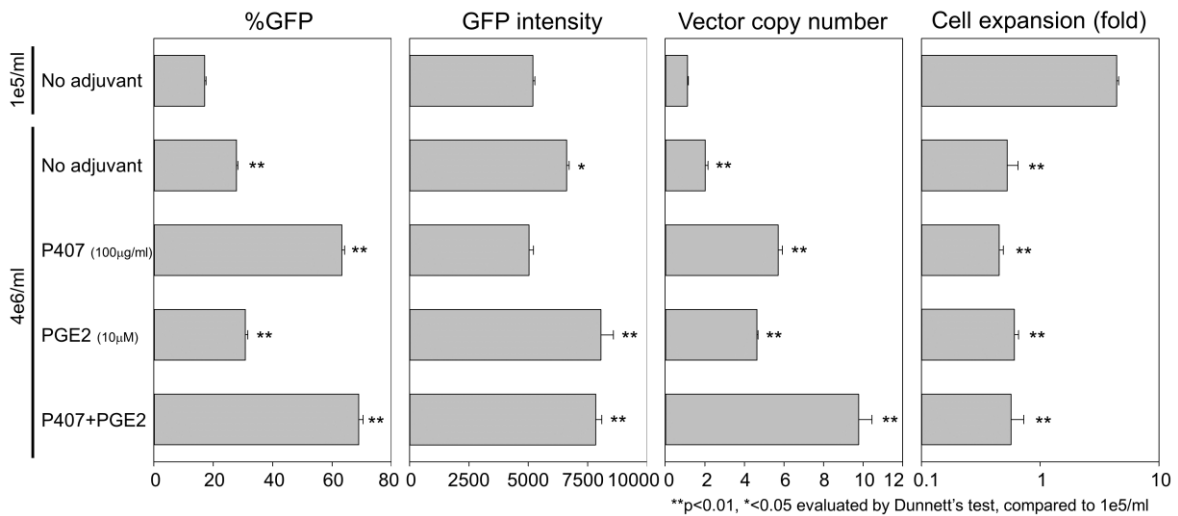

**Supplementary figure 6. High-density culture with P407 and PGE2 improves lentiviral transduction in engrafting human CD34<sup>+</sup> cells in xenograft mice.** (a) After 1-day pre-stimulation, human CD34<sup>+</sup> cells (2e5 cells/mouse) were transduced with a GFP-expressing lentiviral vector at MOI 50 in our standard cell density culture (1e5/ml) without adjuvant and high-density culture (4e6/ml) with/without P407 (100μg/ml) and PGE2 (100μM). One day later, transduced cells were transplanted into immunodeficient mice (NOD.Cg-Kit<sup>W-41J</sup> Tyr<sup>+</sup> Prkdc<sup>scid</sup> Il2rg<sup>tm1Wjl</sup>/ThomJ) 2 days after sublethal busulfan conditioning of 25mg/kg intraperitoneal injection (ip). (b) Twelve weeks after transplantation, we evaluated peripheral blood cells for human cell engraftment (human CD45-positive percentages), %GFP in human cells, and %GFP in whole cells (including both human and mouse cells). Values: mean ± standard error. 1e5/ml: n=3, 4e6/ml without adjuvant: n=1, and 4e6/ml with P407 and PGE2: n=2.

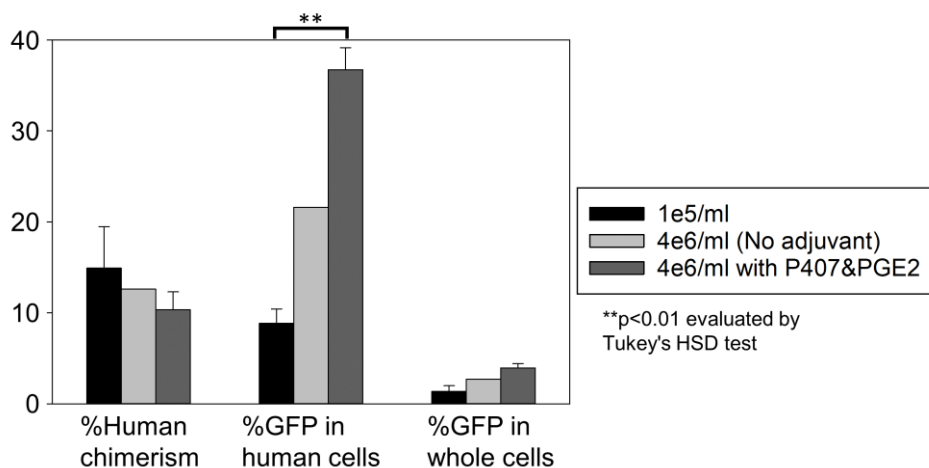

Supplement: mmc1.pdf [file mmc1.pdf]
